# Supplementary material for: Prevalence and Predictors of Food Insecurity among Students of a Spanish University during the COVID-19 Pandemic: FINESCOP Project at the UPV/EHU
Source: MDPI journal article supplement (doi:10.3390/nu15081836), 2023-04-11
Supplement: s1 [file s1]

**Supplementary Table S1.** Findings of other studies on the prevalence of food insecurity among students of higher education, before and during the COVID-19 pandemic.

| Author (ref.)                        | Study design        | Date of data collection                                                                | Country   | Sample size | Assessment                                                     | FI rate | Pre/during the COVID-19 pandemic |
|--------------------------------------|---------------------|----------------------------------------------------------------------------------------|-----------|-------------|----------------------------------------------------------------|---------|----------------------------------|
| Patton-López et al. [12]             | Cross-sectional     | May 2011                                                                               | USA       | 354         | Six-item USDA-FSSM                                             | 59%     | Pre                              |
| Raskind et al. [38]                  | Longitudinal cohort | October/November 2014, February/March 2015, June/ July 2015, and October/November 2015 | USA       | 2377        | Six-item USDA-FSSM                                             | 29%     | Pre                              |
| El Zein et al. [11]                  | Cross-sectional     | Fall 2015, and Spring 2016 academic semesters                                          | USA       | 855         | Ten-item USDA-FSSM                                             | 19%     | Pre                              |
| Theodoritis et al. [20]              | Cross-sectional     | 2016                                                                                   | Greece    | 236         | HFIAS                                                          | 82.1%   | Pre                              |
| Adamovic et al. [13]                 | Cross-sectional     | December 2016, and February 2017                                                       | USA       | 339         | Six-item USDA-FSSM                                             | 54%     | Pre                              |
| Sackey et al. [39]                   | Cross-sectional     | 2019                                                                                   | USA       | 302         | Six-item USDA-FSSM                                             | 28.2%   | Pre                              |
| Ahmad et al. [40]                    | Cross-sectional     | May 2019 to January 2020                                                               | Malaysia  | 663         | Six-item USDA-FSSM                                             | 62.8%   | Pre                              |
| Moore et al. [10]; Owens et al. [14] | Cross-sectional     | May 2020                                                                               | USA       | 651         | Two-item Food Sufficiency Screener, and six-item USDA-FSSM     | 34.5%   | During                           |
| Mihrshahi et al. [23]                | Cross-sectional     | July and September 2020                                                                | Australia | 105         | Six-item USDA-FSSM                                             | 41.9%   | During                           |
| Marques et al. [22]                  | Cross-sectional     | December 2021 to February 2022                                                         | Portugal  | 284         | Brazilian Food Insecurity Scale (an adaption of the USDA-FSSM) | 17.3%   | During                           |

Abbreviations: FI, food insecurity; HFIAS, Household Food Insecurity Access Scale; USDA-FSSM, United States Department of Agriculture Food Security Survey Module.
