# Supplementary material for: Prevalence and Predictors of Food Insecurity among Students of a Spanish University during the COVID-19 Pandemic: FINESCOP Project at the UPV/EHU
Source: MDPI journal article supplement (doi:10.3390/nu15081836), 2023-04-11
Supplement: s1 [file s1]

**Supplementary Table S2.** Population and sample of the University of the Basque Country UPV/EHU by field of education and age.

| Field of education                            | Age   | UPV/EHU's population <sup>1</sup> |      | Real sample      |      | Weighting coefficient | Weighted sample, |
|-----------------------------------------------|-------|-----------------------------------|------|------------------|------|-----------------------|------------------|
|                                               |       | <i>n</i>                          | %    | <i>n</i>         | %    |                       |                  |
| Education                                     | 18    | 573                               | 12.7 | 15               | 15.5 | 38.2                  | 573              |
|                                               | 19    | 667                               | 14.8 | 12               | 12.4 | 55.6                  | 667              |
|                                               | 20    | 771                               | 17.1 | 13               | 13.4 | 59.3                  | 771              |
|                                               | ≥21   | 2506                              | 55.5 | 57               | 58.8 | 44.0                  | 2506             |
|                                               | Total | 4517                              |      | 97 <sup>2</sup>  |      |                       | 4517             |
| Arts and Humanities                           | 18    | 627                               | 12.3 | 2                | 4.4  | 313.5                 | 627              |
|                                               | 19    | 716                               | 14.1 | 2                | 4.4  | 358                   | 716              |
|                                               | 20    | 744                               | 14.6 | 12               | 26.7 | 62                    | 744              |
|                                               | ≥21   | 2994                              | 58.9 | 29               | 64.4 | 103.2                 | 2994             |
|                                               | Total | 5081                              |      | 45 <sup>2</sup>  |      |                       | 5081             |
| Social Sciences, Journalism, and Information  | 18    | 645                               | 11.4 | 20               | 19.0 | 32.3                  | 645              |
|                                               | 19    | 770                               | 13.6 | 28               | 26.7 | 27.5                  | 770              |
|                                               | 20    | 795                               | 14.1 | 13               | 12.4 | 61.2                  | 795              |
|                                               | ≥21   | 3438                              | 60.9 | 44               | 41.9 | 78.1                  | 3438             |
|                                               | Total | 5648                              |      | 105 <sup>2</sup> |      |                       | 5648             |
| Business, Administration, and Law             | 18    | 1114                              | 14.6 | 1                | 3.6  | 1114                  | 1114             |
|                                               | 19    | 1076                              | 14.1 | 4                | 14.3 | 269                   | 1076             |
|                                               | 20    | 1043                              | 13.7 | 4                | 14.3 | 260.8                 | 1043             |
|                                               | ≥21   | 4385                              | 57.6 | 19               | 67.9 | 230.8                 | 4385             |
|                                               | Total | 7618                              |      | 28 <sup>2</sup>  |      |                       | 7618             |
| Natural Sciences, Mathematics, and Statistics | 18    | 543                               | 14.7 | 10               | 16.7 | 54.3                  | 543              |
|                                               | 19    | 513                               | 13.9 | 4                | 6.7  | 128.3                 | 513              |
|                                               | 20    | 509                               | 13.8 | 8                | 13.3 | 63.6                  | 509              |
|                                               | ≥21   | 2135                              | 57.7 | 38               | 63.3 | 56.2                  | 2135             |
|                                               | Total | 3700                              |      | 60 <sup>2</sup>  |      |                       | 3700             |
| Information, and Communication                | 18    | 142                               | 20.7 | 4                | 26.7 | 35.5                  | 142              |
|                                               | 19    | 143                               | 20.8 | 3                | 20.0 | 47.7                  | 143              |
|                                               | 20    | 80                                | 11.7 | 3                | 20.0 | 26.7                  | 80               |
|                                               | ≥21   | 321                               | 46.8 | 5                | 33.3 | 64.2                  | 321              |
|                                               | Total | 686                               |      | 15 <sup>2</sup>  |      |                       | 686              |
| Engineering, Manufacturing, and Construction  | 18    | 1415                              | 14.0 | 5                | 13.5 | 283                   | 1415             |
|                                               | 19    | 1141                              | 11.3 | 2                | 5.4  | 570.5                 | 1141             |
|                                               | 20    | 1174                              | 11.6 | 5                | 13.5 | 234.8                 | 1174             |
|                                               | ≥21   | 6348                              | 63.0 | 25               | 67.6 | 253.9                 | 6348             |
|                                               | Total | 10,078                            |      | 37 <sup>2</sup>  |      |                       | 10078            |
| Health and Welfare                            | 18    | 784                               | 13.2 | 3                | 8.6  | 261.3                 | 784              |
|                                               | 19    | 819                               | 13.8 | 3                | 8.6  | 273                   | 819              |
|                                               | 20    | 841                               | 14.2 | 3                | 8.6  | 280.3                 | 841              |
|                                               | ≥21   | 3477                              | 58.7 | 26               | 74.3 | 133.7                 | 3477             |
|                                               | Total | 5921                              |      | 35 <sup>2</sup>  |      |                       | 5921             |
| Services                                      | 18    | 88                                | 11.4 | 0                | 0    | -                     | 0                |
|                                               | 19    | 91                                | 11.8 | 0                | 0    | -                     | 0                |
|                                               | 20    | 103                               | 13.4 | 0                | 0    | -                     | 0                |
|                                               | ≥21   | 489                               | 63.4 | 0                | 0    | -                     | 0                |

|       |       |        |                  |        |
|-------|-------|--------|------------------|--------|
|       | Total | 771    | 0 <sup>2</sup>   | 0      |
| Total |       | 44,020 | 422 <sup>3</sup> | 43,249 |

Note: <sup>1</sup> The sample was drawn from the matriculation list of the UPV/EHU during 2021/22 (data provided by the Vice-rectorate of Digital Transformation and Communication of the UPV/EHU); <sup>2</sup> Participation rate by each field of education;

<sup>3</sup> Participation rate in the total sample.
